# Supplementary material for: Evaluation of In Vitro Activity of Double-Carbapenem Combinations against KPC-2-, OXA-48- and NDM-Producing Escherichia coli and Klebsiella pneumoniae
Source: MDPI journal article supplement (doi:10.3390/antibiotics11111646), 2022-11-17
Supplement: s1 [file s1]

## Supplementary data

### **Evaluation of *in vitro* activity of double-carbapenem combinations against KPC-2-, OXA-48- and NDM-producing *Escherichia coli* and *Klebsiella pneumoniae***

Lisa Allander<sup>1</sup>, Karin Vickberg<sup>1</sup>, Pernilla Lagerbäck<sup>1</sup>, Linus Sandegren<sup>2</sup>, Thomas Tängdén<sup>1</sup>

<sup>1</sup> Department of Medical Sciences, Uppsala University, Sweden.

<sup>2</sup> Department of Medical Biochemistry and Microbiology, Uppsala University, Sweden.

**Table S1.** Fisher's Exact Test (GraphPad Prism version 9.4.0) testing for associations between synergistic effect in the spot assay and antibiotic susceptibility to meropenem or doripenem, and the presence of specific carbapenemase genes. Statistically significant ( $P < 0.05$ ) results are marked in yellow.

| Carbapenem susceptibility |             |                          |         |            |          |            |                   |
|---------------------------|-------------|--------------------------|---------|------------|----------|------------|-------------------|
| Species                   | Combination | Meropenem susceptibility | Synergy | No synergy | P-value  | Odds ratio | 95% CI            |
| <i>E. coli</i>            | ETP + MEM   | S, I                     | 10      | 4          | 0.0006   | +infinity  | 5.010 – +infinity |
|                           |             | R                        | 0       | 10         |          |            |                   |
|                           | ETP + DOR   | S, I                     | 10      | 4          | 0.0006   | +infinity  | 5.010 – +infinity |
|                           |             | R                        | 0       | 10         |          |            |                   |
|                           | MEM + DOR   | S, I                     | 9       | 5          | 0.002    | +infinity  | 3.807 – +infinity |
|                           |             | R                        | 0       | 10         |          |            |                   |
| <i>K. pneumoniae</i>      | ETP + MEM   | S, I                     | 6       | 1          | 0.0002   | 114.0      | 6.944 – 1318      |
|                           |             | R                        | 1       | 19         |          |            |                   |
|                           | ETP + DOR   | S, I                     | 2       | 5          | 0.2692   | 3.600      | 0.4477 – 26.01    |
|                           |             | R                        | 2       | 18         |          |            |                   |
|                           | MEM + DOR   | S, I                     | 4       | 3          | 0.1751   | 4.000      | 0.7459 – 19.30    |
|                           |             | R                        | 5       | 15         |          |            |                   |
| Species                   | Combination | Doripenem susceptibility | Synergy | No synergy | P-value  | Odds ratio | 95% CI            |
| <i>E. coli</i>            | ETP + MEM   | S, I                     | 10      | 3          | 0.0002   | +infinity  | 6.671 – +infinity |
|                           |             | R                        | 0       | 11         |          |            |                   |
|                           | ETP + DOR   | S, I                     | 9       | 4          | 0.0045   | 22.50      | 2.112 – 265.5     |
|                           |             | R                        | 1       | 10         |          |            |                   |
|                           | MEM + DOR   | S, I                     | 8       | 5          | 0.0131   | 16.00      | 1.563 – 191.5     |
|                           |             | R                        | 1       | 10         |          |            |                   |
| <i>K. pneumoniae</i>      | ETP + MEM   | S, I                     | 5       | 0          | 0.0003   | +infinity  | 6.339 – +infinity |
|                           |             | R                        | 2       | 20         |          |            |                   |
|                           | ETP + DOR   | S, I                     | 2       | 3          | 0.1444   | 6.667      | 0.7369 – 50.35    |
|                           |             | R                        | 2       | 20         |          |            |                   |
|                           | MEM + DOR   | S, I                     | 3       | 2          | 0.2950   | 4.000      | 0.6433 – 25.35    |
|                           |             | R                        | 6       | 16         |          |            |                   |
| Carbapenemase type        |             |                          |         |            |          |            |                   |
| Species                   | Combination | KPC-2 vs. Non-KPC-2      | Synergy | No synergy | P-value  | Odds ratio | 95% CI            |
| <i>E. coli</i>            | ETP + MEM   |                          |         | NA         |          |            |                   |
|                           | ETP + DOR   |                          |         | NA         |          |            |                   |
|                           | MEM + DOR   |                          |         | NA         |          |            |                   |
| <i>K. pneumoniae</i>      | ETP + MEM   | KPC-2                    | 1       | 9          | 0.2040   | 0.2037     | 0.01619 – 2.032   |
|                           |             | Non-KPC-2                | 6       | 11         |          |            |                   |
|                           | ETP + DOR   | KPC-2                    | 1       | 9          | > 0.9999 | 0.5185     | 0.03635 – 4.055   |
|                           |             | Non-KPC-2                | 3       | 14         |          |            |                   |
|                           | MEM + DOR   | KPC-2                    | 1       | 9          | 0.0912   | 0.1250     | 0.01029 – 1.112   |
|                           |             | Non-KPC-2                | 8       | 9          |          |            |                   |
| Species                   | Combination | OXA-48 vs. Non-OXA-48    | Synergy | No synergy | P-value  | Odds ratio | 95% CI            |

| <i>E. coli</i>       | ETP + MEM   | OXA-48          | 8       | 2          | 0.0027  | 24.00      | 2.515 – 148.1  |
|----------------------|-------------|-----------------|---------|------------|---------|------------|----------------|
|                      |             | Non-OXA-48      | 2       | 12         |         |            |                |
|                      | ETP + DOR   | OXA-48          | 8       | 2          | 0.0027  | 24.00      | 2.515 – 148.1  |
|                      |             | Non-OXA-48      | 2       | 12         |         |            |                |
|                      | MEM + DOR   | OXA-48          | 7       | 3          | 0.0104  | 14.00      | 1.699 – 81.13  |
|                      |             | Non-OXA-48      | 2       | 12         |         |            |                |
| <i>K. pneumoniae</i> | ETP + MEM   | OXA-48          | 4       | 3          | 0.0496  | 7.556      | 1.181 – 39.82  |
|                      |             | Non-OXA-48      | 3       | 17         |         |            |                |
|                      | ETP + DOR   | OXA-48          | 3       | 4          | 0.0419  | 14.25      | 1.536 – 191.4  |
|                      |             | Non-OXA-48      | 1       | 19         |         |            |                |
|                      | MEM + DOR   | OXA-48          | 5       | 2          | 0.0235  | 10.00      | 1.541 – 57.98  |
|                      |             | Non-OXA-48      | 4       | 16         |         |            |                |
| Species              | Combination | NDM vs. Non-NDM | Synergy | No synergy | P-value | Odds ratio | 95% CI         |
| <i>E. coli</i>       | ETP + MEM   | NDM             | 0       | 10         | 0.0006  | 0.000      | 0.000 – 0.1996 |
|                      |             | Non-NDM         | 10      | 4          |         |            |                |
|                      | ETP + DOR   | NDM             | 0       | 10         | 0.0006  | 0.000      | 0.000 – 0.1996 |
|                      |             | Non-NDM         | 10      | 4          |         |            |                |
|                      | MEM + DOR   | NDM             | 0       | 10         | 0.002   | 0.000      | 0.000 – 0.2627 |
|                      |             | Non-NDM         | 9       | 5          |         |            |                |
| <i>K. pneumoniae</i> | ETP + MEM   | NDM             | 2       | 8          | 0.6784  | 0.6000     | 0.1019 – 3.296 |
|                      |             | Non-NDM         | 5       | 12         |         |            |                |
|                      | ETP + DOR   | NDM             | 0       | 10         | 0.2638  | 0.000      | 0.000 – 1.835  |
|                      |             | Non-NDM         | 4       | 13         |         |            |                |
|                      | MEM + DOR   | NDM             | 3       | 7          | >0.9999 | 0.7857     | 0.1725 – 4.546 |
|                      |             | Non-NDM         | 6       | 11         |         |            |                |

Abbreviations: ETP, ertapenem; MEM, meropenem; DOR, doripenem; S, susceptible; I, susceptible with increased exposure; R, resistant; CI, confidence interval; NA, not applicable because of low number of KPC-2 producing *E. coli* (n=4).

**Table S2.** Mutants isolated from antibiotic-containing plates following 24-hour time-kill experiments with *E. coli* ATCC 25922 wild-type and constructed carbapenemase-producing strains. The time-kill regimen in which the mutant arose and the antibiotic-containing plate on which it was selected are presented. MIC values for ertapenem, meropenem and doripenem are presented for mutants. The fold-increase in MIC compared to the parental strain is presented in parentheses. Bacterial concentration (CFU/mL) on antibiotic plates and non-selective plates (viable count), and mutant frequency are presented. Growth rates of mutants are relative to the respective parental strain.

| <i>E. coli</i> ATCC 25922 mutants    | Time-kill regimen | Concentration in plate | MIC (mg/L)   |               |               | Bacterial concentration (CFU/mL) |                        | Mutant frequency        | Relative growth rate (± SD) |
|--------------------------------------|-------------------|------------------------|--------------|---------------|---------------|----------------------------------|------------------------|-------------------------|-----------------------------|
|                                      |                   |                        | ETP          | MEM           | DOR           | Antibiotic plate                 | Viable count           |                         |                             |
| Wild-type clone 1                    | 0.5x MIC ETP      | 4x MIC ETP             | 0.5<br>(x64) | 0.125<br>(x8) | 0.062<br>(x2) | 1 × 10 <sup>2</sup>              | 5.30 × 10 <sup>8</sup> | 1.89 × 10 <sup>-7</sup> | 0.56 ± 0.01                 |
| <i>bla</i> <sub>OXA-48</sub> clone 1 | Growth control    | 4x MIC ETP             | 2<br>(x16)   | 1<br>(x32)    | 2<br>(x32)    | 1 × 10 <sup>2</sup>              | 1.74 × 10 <sup>9</sup> | 5.75 × 10 <sup>-8</sup> | 0.91 ± 0.05                 |
| <i>bla</i> <sub>OXA-48</sub> clone 2 | 1x MIC ETP+MEM    | 4x MIC ETP             | 4<br>(x32)   | 1<br>(x32)    | 1<br>(x16)    | 5 × 10 <sup>1</sup>              | 1.72 × 10 <sup>9</sup> | 2.91 × 10 <sup>-8</sup> | 0.79 ± 0.06                 |
| <i>bla</i> <sub>OXA-48</sub> clone 3 | 0.5x MIC ETP+MEM  | 4x MIC MEM             | 2<br>(x16)   | 1<br>(x32)    | 2<br>(x32)    | 2 × 10 <sup>2</sup>              | 2.40 × 10 <sup>9</sup> | 8.33 × 10 <sup>-8</sup> | 1.01 ± 0.03                 |
| <i>bla</i> <sub>NDM-1</sub> clone 1  | 1x MIC DOR        | 4x MIC DOR             | 64<br>(x4)   | 32<br>(x2)    | 32<br>(x2)    | NA                               | 1.56 × 10 <sup>9</sup> | NA                      | 0.94 ± 0.04                 |

Abbreviations: ETP, ertapenem; MEM, meropenem; DOR, doripenem. NA, not available because no single colonies were detected but low growth with colonies fused together occurred at 10-fold dilution.

**Table S3.** Whole genome sequencing results of mutants with decreased susceptibility to carbapenems isolated following time-kill experiments with *E. coli* ATCC 25922 wild-type and constructed carbapenemase-producing strains. Point mutations, amino acid changes and structural variations in *E. coli* ATCC 25922 mutants are presented.

| Parental strain | <i>E. coli</i> ATCC 25922 mutants   | Genetic changes                                                                                                                              | Function                                                             |
|-----------------|-------------------------------------|----------------------------------------------------------------------------------------------------------------------------------------------|----------------------------------------------------------------------|
| ARU961          | Wild-type clone 1                   | –                                                                                                                                            | –                                                                    |
| ARU1028         | <i>bla<sub>OXa-48</sub></i> clone 1 | IS3 inserted 169 nucleotides upstream<br><i>bla<sub>OXa-48</sub></i> start codon                                                             | –                                                                    |
| ARU1028         | <i>bla<sub>OXa-48</sub></i> clone 2 | <i>phoR</i> 217G>T, Glu73*                                                                                                                   | <i>phoR</i> : phosphate regulon sensor histidine kinase PhoR         |
|                 |                                     | <i>rclR</i> 719G>A, Arg240Gln                                                                                                                | <i>rclR</i> : AraC family transcriptional regulator                  |
|                 |                                     | Gene DR76_RS09145 1672G>T, Glu558*                                                                                                           | Gene DR76_RS09145: sigma-54-dependent transcriptional regulator      |
|                 |                                     | <i>yeaQ</i> 210G>T                                                                                                                           | <i>yeaQ</i> : GlsB/YeaQ/YmgE family stress response membrane protein |
| ARU1028         | <i>bla<sub>OXa-48</sub></i> clone 3 | <i>trpS</i> 918G>T, Met306Ile<br><i>trpS</i> 956G>T, Arg319Leu<br>T>C,176 nucleotides upstream of<br><i>bla<sub>OXa-48</sub></i> start codon | <i>trpS</i> : tryptophan-tRNA ligase                                 |
| ARU1027         | <i>bla<sub>NDM-1</sub></i> clone 1  | –                                                                                                                                            | –                                                                    |

Abbreviations: \*, premature stop codon.

**Table S4.** Primers used in the study. Gradient PCR (Thermo Scientific™ Phusion™ High-Fidelity DNA Polymerase) was used for amplifications.

| Application                                                                                   | Sequence (5'→3')                                                                                                                                                           |
|-----------------------------------------------------------------------------------------------|----------------------------------------------------------------------------------------------------------------------------------------------------------------------------|
| Amplification of <i>cat-sacB</i> cassette with regions homologous to <i>bgl</i> in ATCC 25922 | <b>Forward:</b> GCTCGATAAACTGCTGGCAGAAAAAGATAGC<br>GATAAATAATTCACCAGACAAATCCCAAT<br><br><b>Reverse:</b> GACTGTTCTGAATGCGACGATATTTAAGGTGC<br>TTTATTGGAATATCCCTTTATGGTGCAAAG |
| Amplification of <i>bla<sub>NDM-1</sub></i> with homologies to <i>cat-sacB</i>                | <b>Forward:</b> AGCCGGATTAATAATCTGGCTTTTATATTCTC<br>TGTCGACTTGAATTCGCCCCATATTT<br><br><b>Reverse:</b> AAAGCCCCGAGCGGTAAACTCAGGGCTTTAT<br>TTGAGCTCTCAGCGCAGCTTGTCGGCCA      |
| Amplification of <i>bla<sub>KPC-2</sub></i> with homologies to <i>cat-sacB</i>                | <b>Forward:</b> AGCCGGATTAATAATCTGGCTTTTATATTCTCTG<br>TCGACTAGGTGAAGTTCTGGGCAGT<br><br><b>Reverse:</b> AAAGCCCCGAGCGGTAAACTCAGGGCTTTATTT<br>GAGCTCCTAGGGAATAATTTTTCCT      |
| Amplification of <i>bla<sub>OXA-48</sub></i> with homologies to <i>cat-sacB</i>               | <b>Forward:</b> AGCCGGATTAATAATCTGGCTTTTATATTCTCTGT<br>CGACGGTCAGTTTTCAGTTGGTGT<br><br><b>Reverse:</b> AAAGCCCCGAGCGGTAAACTCAGGGCTTTATTTGA<br>GCTCGCGGTGGTGGGCAATAGAT      |
| Screening of insertion site ATCC 25922 <i>bgl</i>                                             | <b>Forward:</b> CGCTGCCAGAATATTTGTGA<br><br><b>Reverse:</b> CGCCTTTTCTAATAGCTCAA                                                                                           |

## (a) Ertapenem + meropenem

KPC-2 OXA-48 NDM-1 NDM-5 NDM-1+OXA-48

Clinical *E. coli* isolates

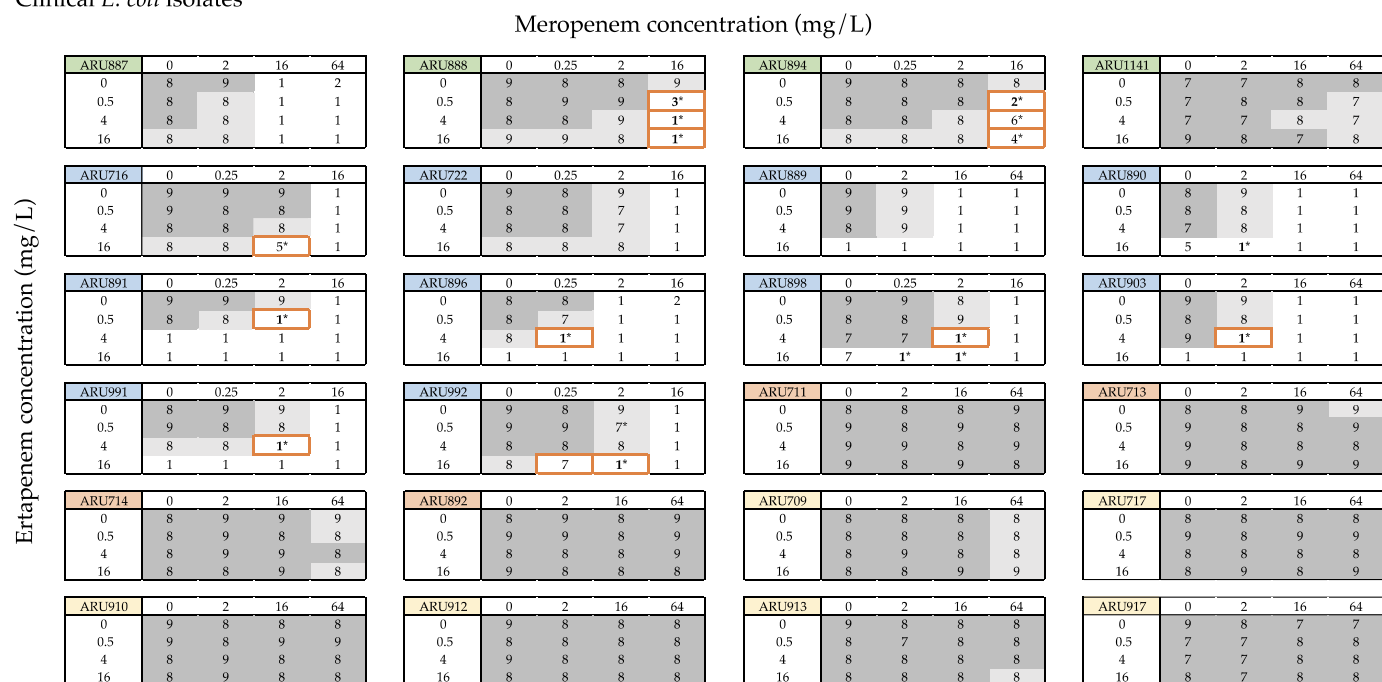

Clinical *K. pneumoniae* isolates

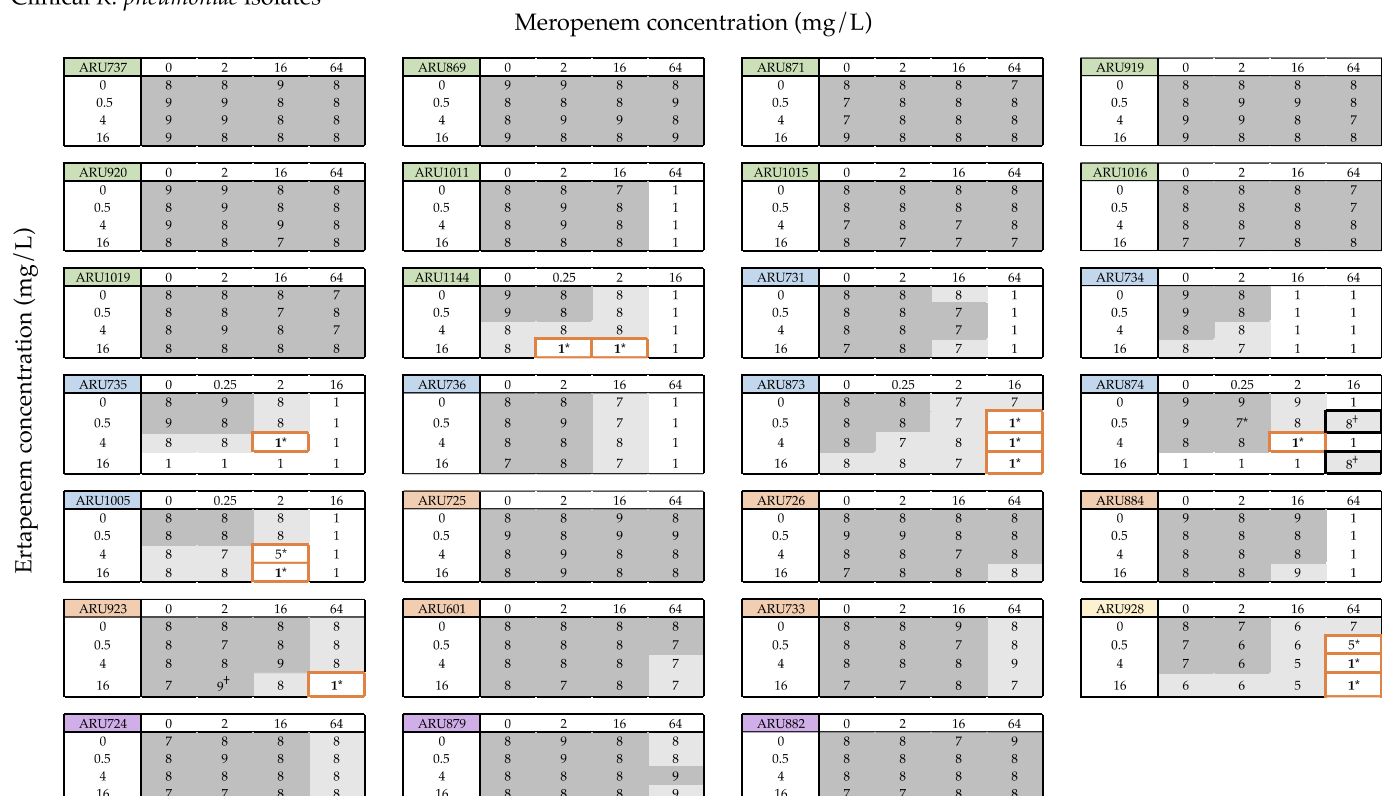

**(b) Ertapenem + doripenem**

KPC-2 OXA-48 NDM-1 NDM-5 NDM-1 + OXA-48  
Clinical *E. coli* isolates

Doripenem concentration (mg/ L)

Ertapenem concentration (mg/L)

Clinical *K. pneumoniae* isolates

Doripenem concentration (mg/ L)

Figure 1 displays 24 heatmaps arranged in a 6x4 grid, showing the Ertapenem concentration (mg/L) for various ARUs (Antibiotic Resistance Units) over time (0, 0.5, 4, 16 hours) and concentration (0, 1, 8, 32 mg/L). The heatmaps are labeled ARU737, ARU920, ARU1019, ARU735, ARU1005, ARU923, ARU724, ARU869, ARU1011, ARU1144, ARU736, ARU725, ARU601, ARU871, ARU1015, ARU731, ARU873, ARU726, ARU733, ARU882, ARU919, ARU1016, ARU734, ARU874, ARU884, and ARU928. The color scale ranges from light yellow (low concentration) to dark purple (high concentration). The concentration values are indicated by the color of the cells, with some cells highlighted in orange to indicate specific data points.



### (c) Meropenem + doripenem

KPC-2 OXA-48 NDM-1 NDM-5 NDM-1 + OXA-48

Clinical *E. coli* isolates

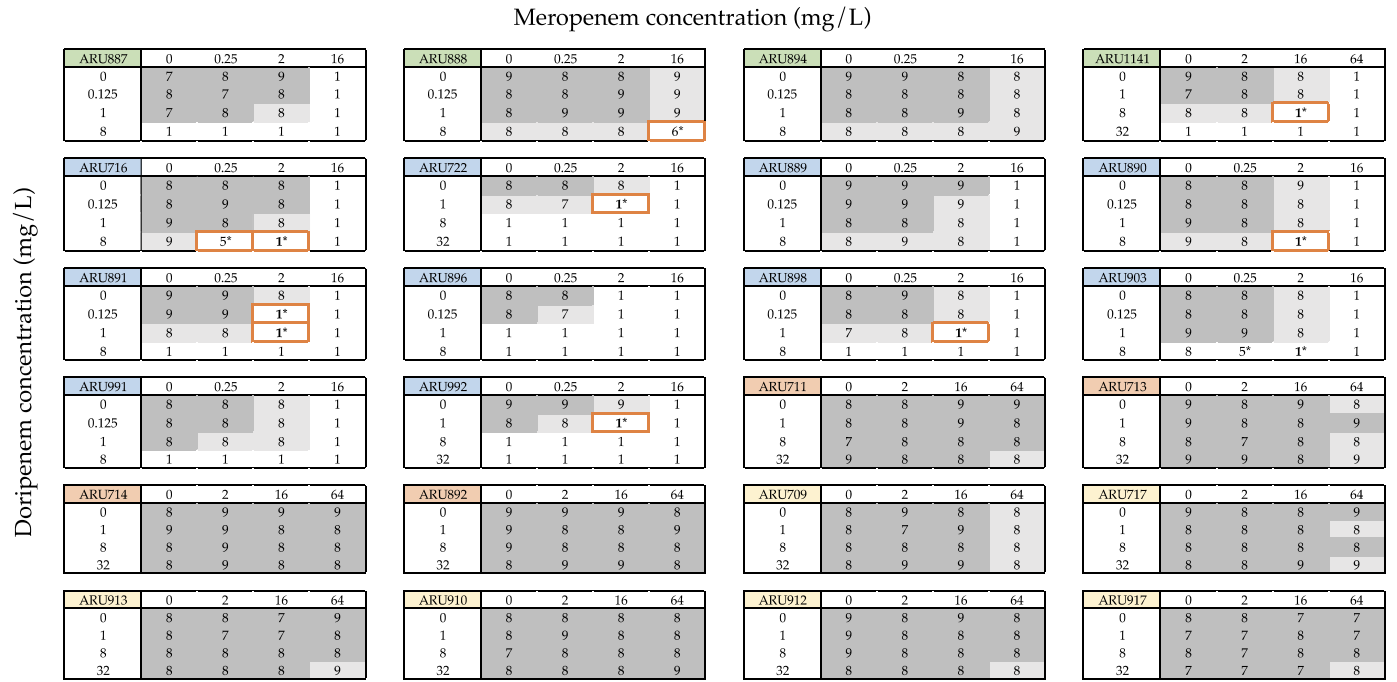

Clinical *K. pneumoniae* isolates

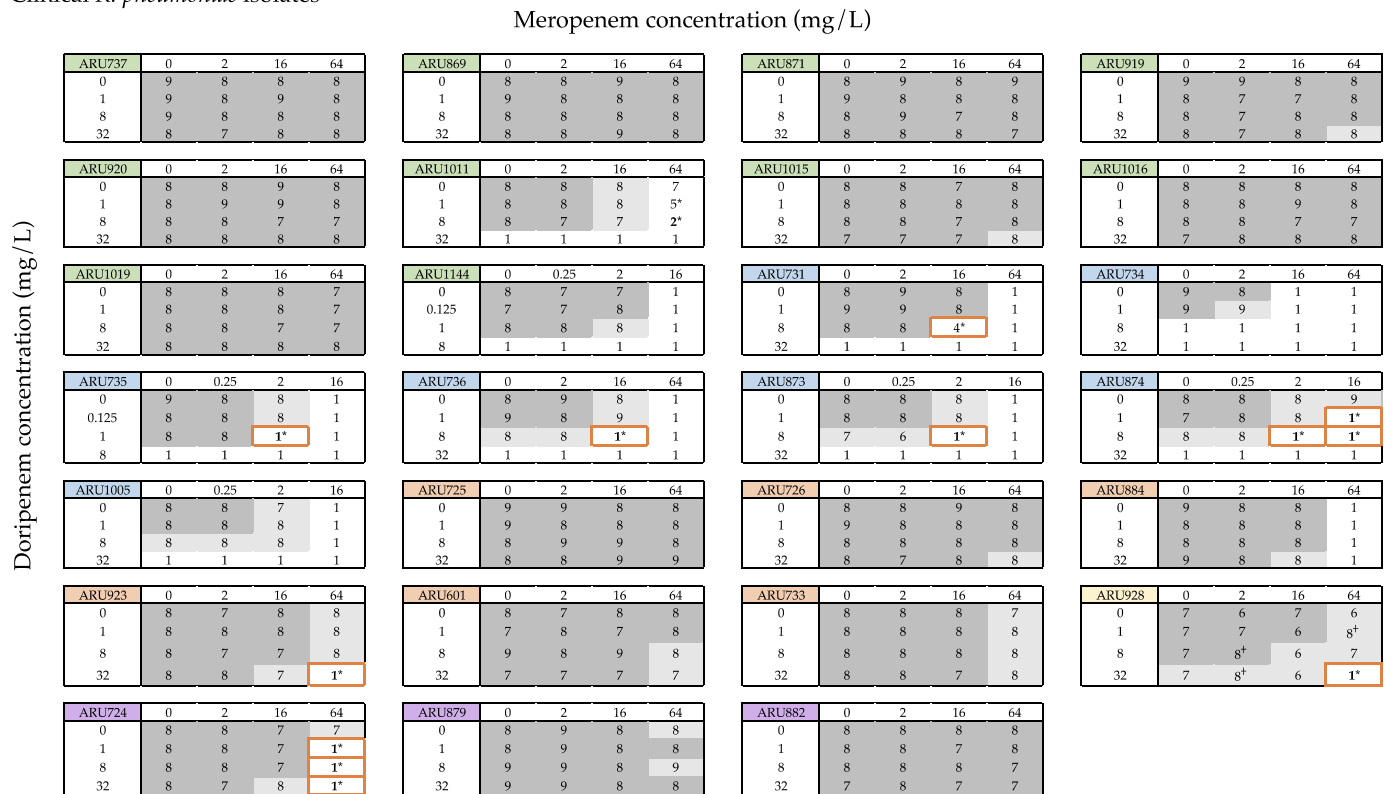

**Figure S1.** Time-lapse microscopy and spot assay results at 24 hours for double-carbapenem combinations (ertapenem, meropenem and doripenem) against clinical isolates. The isolates are color-coded based on carbapenemase type. Dark grey represents growth ( $> ca 10^6$  CFU/mL) in time-lapse microscopy at 6 and 24 hours, as determined with the algorithms and predefined cut-offs for BCA ( $> 8$ ) and  $SESA_{max}$  ( $> 5.8$ ). Light grey depicts growth only at 24 hours and white boxes represent no growth at 6 or 24 h. Bacterial growth at 24 hours, as determined with the spot assay is presented in  $\log_{10}$  CFU/mL. No visible growth was set to  $1 \log_{10}$  CFU/mL ( $LOD = 2 \log_{10}$  CFU/mL). Combinations showing enhanced effect compared to the most active single antibiotic in the time-lapse assay are marked with a thick orange outline. Combinations showing reduced effects are marked with a thick black outline. Synergistic (\*) and antagonistic effects (†) with the combination are also indicated. When the synergistic effect was also bactericidal, the  $\log_{10}$  CFU/mL value is marked in bold.
